# Supplementary material for: The Effects of Resveratrol-Rich Extracts of Vitis vinifera Pruning Waste on HeLa, MCF-7 and MRC-5 Cells: Apoptosis, Autophagia and Necrosis Interplay
Source: MDPI journal article supplement (doi:10.3390/pharmaceutics14102017), 2022-09-23
Supplement: s1 [file s1]

## Supplementary data

**Table S1.** Content of total phenols, total flavonoids, and antioxidant activity (expressed as IC<sub>50</sub> value) of extracts obtained by subcritical water extraction

| Temperature (°C) | Extraction time (min) | HCl addition (%) | Total phenols (g GAE/100 g DW) <sup>1</sup> | Total flavonoids (g CE/100 g DW) <sup>2</sup> | IC <sub>50</sub> (mg/mL) |
|------------------|-----------------------|------------------|---------------------------------------------|-----------------------------------------------|--------------------------|
| 160              | 15                    | 1.5              | 7.52                                        | 1.89                                          | 0.0650                   |
| 120              | 25                    | 0                | 2.44                                        | 1.08                                          | 0.1010                   |
| 120              | 15                    | 0.75             | 4.42                                        | 1.60                                          | 0.0826                   |
| 160              | 25                    | 0.75             | 7.48                                        | 1.82                                          | 0.0667                   |
| 160              | 25                    | 0.75             | 7.77                                        | 1.97                                          | 0.0656                   |
| 200              | 15                    | 0.75             | 10.17                                       | 2.75                                          | 0.0502                   |
| 200              | 35                    | 0.75             | 9.77                                        | 2.90                                          | 0.0456                   |
| 160              | 25                    | 0.75             | 7.14                                        | 1.76                                          | 0.0723                   |
| 200              | 25                    | 0                | 8.07                                        | 2.57                                          | 0.0435                   |
| 200              | 25                    | 1.5              | 9.90                                        | 2.90                                          | 0.0451                   |
| 160              | 35                    | 0                | 4.28                                        | 1.32                                          | 0.0718                   |
| 160              | 15                    | 0                | 5.08                                        | 1.61                                          | 0.0605                   |
| 120              | 25                    | 1.5              | 3.94                                        | 1.22                                          | 0.0833                   |
| 160              | 35                    | 1.5              | 7.41                                        | 1.81                                          | 0.0722                   |
| 120              | 35                    | 0.75             | 3.93                                        | 1.22                                          | 0.0906                   |

1 - mg of gallic acid equivalents per g dry weight, 2 - mg of catechin equivalents per g dry weight

**Table S2.** TWO WAY ANOVA sample legend

|          |                                    |
|----------|------------------------------------|
| Sample 1 | DE (dry extract with maltodextrin) |
| Sample 2 | SWE (supercritical water extract)  |
| Sample 3 | Resveratrol                        |
| Sample 4 | Maltodextrin (control)             |

**Table S3.** TWO WAY ANOVA analysis for 24h treatment: type of extract vs concentrations in HeLa Cells. Sample: (samples 1-4); columns: concentrations (25 -125uM)

| ANOVA                      |           |           |           |          |                |               |
|----------------------------|-----------|-----------|-----------|----------|----------------|---------------|
| <i>Source of Variation</i> | <i>SS</i> | <i>df</i> | <i>MS</i> | <i>F</i> | <i>P-value</i> | <i>F crit</i> |
| Sample                     | 3805.901  | 3         | 1268.634  | 273.9923 | 2.09E-16       | 3.098391      |
| Columns                    | 5476.676  | 4         | 1369.169  | 295.7054 | 1.75E-17       | 2.866081      |
| Interaction                | 958.767   | 12        | 79.89725  | 17.25576 | 5.56E-08       | 2.277581      |
| Within                     | 92.6036   | 20        | 4.63018   |          |                |               |
| Total                      | 10333.95  | 39        |           |          |                |               |

**Table S4.** TWO WAY ANOVA analysis for 24h treatment: type of extract vs concentrations in MCF-7 Cells. Sample: (samples 1-4); columns: concentrations (25 -125uM)

| ANOVA                      |           |           |           |          |                |               |
|----------------------------|-----------|-----------|-----------|----------|----------------|---------------|
| <i>Source of Variation</i> | <i>SS</i> | <i>df</i> | <i>MS</i> | <i>F</i> | <i>P-value</i> | <i>F crit</i> |
| Sample                     | 1365.162  | 3         | 455.054   | 139.4133 | 1.42E-13       | 3.098391      |
| Columns                    | 6081.654  | 4         | 1520.414  | 465.8038 | 1.99E-19       | 2.866081      |
| Interaction                | 376.6371  | 12        | 31.38643  | 9.615751 | 7.24E-06       | 2.277581      |
| Within                     | 65.28128  | 20        | 3.264064  |          |                |               |
| Total                      | 7888.735  | 39        |           |          |                |               |

**Table S5.** TWO WAY ANOVA analysis for 24h treatment: type of extract vs concentrations in MRC-5 Cells. Sample: (samples 1-4); columns: concentrations (25 -125uM)

| ANOVA                      |           |           |           |          |                |               |
|----------------------------|-----------|-----------|-----------|----------|----------------|---------------|
| <i>Source of Variation</i> | <i>SS</i> | <i>df</i> | <i>MS</i> | <i>F</i> | <i>P-value</i> | <i>F crit</i> |
| Sample                     | 3186.513  | 3         | 1062.171  | 331.603  | 3.24E-17       | 3.098391      |
| Columns                    | 2332.277  | 4         | 583.0693  | 182.0305 | 2E-15          | 2.866081      |
| Interaction                | 910.9615  | 12        | 75.91346  | 23.6997  | 3.31E-09       | 2.277581      |
| Within                     | 64.06282  | 20        | 3.203141  |          |                |               |
| Total                      | 6493.815  | 39        |           |          |                |               |

**Table S6.** TWO WAY ANOVA analysis for 24h treatment: type of extract vs cell type at 25  $\mu$ M concentration. Sample: (samples 1-4); columns: cell type (HeLa, MCF-7, MRC-5)

| ANOVA                      |           |           |           |          |                |               |
|----------------------------|-----------|-----------|-----------|----------|----------------|---------------|
| <i>Source of Variation</i> | <i>SS</i> | <i>df</i> | <i>MS</i> | <i>F</i> | <i>P-value</i> | <i>F crit</i> |
| Sample                     | 248.022   | 3         | 82.674    | 13.70089 | 0.000351       | 3.490295      |
| Columns                    | 317.4103  | 2         | 158.7051  | 26.30092 | 4.11E-05       | 3.885294      |
| Interaction                | 500.226   | 6         | 83.37099  | 13.8164  | 9.1E-05        | 2.99612       |
| Within                     | 72.41045  | 12        | 6.034204  |          |                |               |
| Total                      | 1138.069  | 23        |           |          |                |               |

**Table S7.** TWO WAY ANOVA analysis for 24h treatment: type of extract vs cell type at 50  $\mu$ M concentration. Sample: (samples 1-4); columns: cell type (HeLa, MCF-7, MRC-5)

| ANOVA                      |           |           |           |          |                |               |
|----------------------------|-----------|-----------|-----------|----------|----------------|---------------|
| <i>Source of Variation</i> | <i>SS</i> | <i>df</i> | <i>MS</i> | <i>F</i> | <i>P-value</i> | <i>F crit</i> |
| Sample                     | 572.0206  | 3         | 190.6735  | 43.79525 | 9.71E-07       | 3.490295      |
| Columns                    | 920.6172  | 2         | 460.3086  | 105.7269 | 2.4E-08        | 3.885294      |
| Interaction                | 302.5947  | 6         | 50.43245  | 11.58368 | 0.000218       | 2.99612       |
| Within                     | 52.24499  | 12        | 4.353749  |          |                |               |
| Total                      | 1847.477  | 23        |           |          |                |               |

**Table S8.** TWO WAY ANOVA analysis for 24h treatment: type of extract vs cell type at 75  $\mu$ M concentration. Sample: (samples 1-4); columns: cell type (HeLa, MCF-7, MRC-5)

| ANOVA                      |           |           |           |          |                |               |
|----------------------------|-----------|-----------|-----------|----------|----------------|---------------|
| <i>Source of Variation</i> | <i>SS</i> | <i>df</i> | <i>MS</i> | <i>F</i> | <i>P-value</i> | <i>F crit</i> |
| Sample                     | 1363.461  | 3         | 454.4869  | 129.8195 | 2.06E-09       | 3.490295      |
| Columns                    | 1105.473  | 2         | 552.7363  | 157.8834 | 2.41E-09       | 3.885294      |
| Interaction                | 517.8656  | 6         | 86.31094  | 24.65383 | 4.38E-06       | 2.99612       |
| Within                     | 42.01096  | 12        | 3.500914  |          |                |               |
| Total                      | 3028.81   | 23        |           |          |                |               |

**Table S9.** TWO WAY ANOVA analysis for 24h treatment: type of extract vs cell type at 100  $\mu$ M concentration. Sample: (samples 1-4); columns: cell type (HeLa, MCF-7, MRC-5)

| ANOVA                      |           |           |           |          |                |               |
|----------------------------|-----------|-----------|-----------|----------|----------------|---------------|
| <i>Source of Variation</i> | <i>SS</i> | <i>df</i> | <i>MS</i> | <i>F</i> | <i>P-value</i> | <i>F crit</i> |
| Sample                     | 1837.802  | 3         | 612.6007  | 371.5994 | 4.26E-12       | 3.490295      |
| Columns                    | 1609.272  | 2         | 804.6361  | 488.0867 | 3.21E-12       | 3.885294      |
| Interaction                | 786.2866  | 6         | 131.0478  | 79.49267 | 5.86E-09       | 2.99612       |
| Within                     | 19.78262  | 12        | 1.648552  |          |                |               |
| Total                      | 4253.143  | 23        |           |          |                |               |

**Table S10.** TWO WAY ANOVA analysis for 24h treatment: type of extract vs cell type at 125  $\mu$ M concentration. Sample: (samples 1-4); columns: cell type (HeLa, MCF-7, MRC-5)

| ANOVA                      |           |           |           |          |                |               |
|----------------------------|-----------|-----------|-----------|----------|----------------|---------------|
| <i>Source of Variation</i> | <i>SS</i> | <i>df</i> | <i>MS</i> | <i>F</i> | <i>P-value</i> | <i>F crit</i> |
| Sample                     | 3031.952  | 3         | 1010.651  | 341.6411 | 7.01E-12       | 3.490295      |
| Columns                    | 1989.624  | 2         | 994.8119  | 336.287  | 2.9E-11        | 3.885294      |
| Interaction                | 1443.712  | 6         | 240.6186  | 81.33891 | 5.13E-09       | 2.99612       |
| Within                     | 35.49868  | 12        | 2.958223  |          |                |               |
| Total                      | 6500.786  | 23        |           |          |                |               |

**Table S11.** TWO WAY ANOVA analysis for 48h treatment: type of extract vs concentrations in HeLa Cells. Sample: (samples 1-4); columns: concentrations (25 -125uM)

| ANOVA                      |           |           |           |          |                |               |
|----------------------------|-----------|-----------|-----------|----------|----------------|---------------|
| <i>Source of Variation</i> | <i>SS</i> | <i>df</i> | <i>MS</i> | <i>F</i> | <i>P-value</i> | <i>F crit</i> |
| Sample                     | 6652.93   | 3         | 2217.643  | 188.6251 | 7.83E-15       | 3.098391      |
| Columns                    | 4076.317  | 4         | 1019.079  | 86.67939 | 2.43E-12       | 2.866081      |
| Interaction                | 1518.243  | 12        | 126.5202  | 10.76137 | 2.95E-06       | 2.277581      |
| Within                     | 235.1376  | 20        | 11.75688  |          |                |               |
| Total                      | 12482.63  | 39        |           |          |                |               |

**Table S12.** TWO WAY ANOVA analysis for 48h treatment: type of extract vs concentrations in MCF-7 Cells. Sample: (samples 1-4); columns: concentrations (25 -125uM)

| ANOVA                      |           |           |           |          |                |               |
|----------------------------|-----------|-----------|-----------|----------|----------------|---------------|
| <i>Source of Variation</i> | <i>SS</i> | <i>df</i> | <i>MS</i> | <i>F</i> | <i>P-value</i> | <i>F crit</i> |
| Sample                     | 2046.635  | 3         | 682.2117  | 137.1646 | 1.66E-13       | 3.098391      |
| Columns                    | 7537.9    | 4         | 1884.475  | 378.8901 | 1.53E-18       | 2.866081      |
| Interaction                | 244.7131  | 12        | 20.39276  | 4.100141 | 0.002689       | 2.277581      |
| Within                     | 99.47343  | 20        | 4.973672  |          |                |               |
| Total                      | 9928.721  | 39        |           |          |                |               |

**Table S13.** TWO WAY ANOVA analysis for 48h treatment: type of extract vs concentrations in MRC-5 Cells. Sample: (samples 1-4); columns: concentrations (25 -125uM)

| ANOVA                      |           |           |           |          |                |               |
|----------------------------|-----------|-----------|-----------|----------|----------------|---------------|
| <i>Source of Variation</i> | <i>SS</i> | <i>df</i> | <i>MS</i> | <i>F</i> | <i>P-value</i> | <i>F crit</i> |
| Sample                     | 3116.045  | 3         | 1038.682  | 276.4    | 1.92E-16       | 3.098391      |
| Columns                    | 3175.584  | 4         | 793.896   | 211.2609 | 4.7E-16        | 2.866081      |
| Interaction                | 649.0391  | 12        | 54.08659  | 14.3928  | 2.65E-07       | 2.277581      |
| Within                     | 75.15786  | 20        | 3.757893  |          |                |               |
| Total                      | 7015.826  | 39        |           |          |                |               |

**Table S14.** TWO WAY ANOVA analysis for 48h treatment: type of extract vs cell type at 25  $\mu$ M concentration. Sample: (samples 1-4); columns: cell type (HeLa, MCF-7, MRC-5)

| ANOVA                      |           |           |           |          |                |               |
|----------------------------|-----------|-----------|-----------|----------|----------------|---------------|
| <i>Source of Variation</i> | <i>SS</i> | <i>df</i> | <i>MS</i> | <i>F</i> | <i>P-value</i> | <i>F crit</i> |
| Sample                     | 609.3769  | 3         | 203.1256  | 16.87144 | 0.000133       | 3.490295      |
| Columns                    | 1120.411  | 2         | 560.2055  | 46.53019 | 2.22E-06       | 3.885294      |
| Interaction                | 770.9547  | 6         | 128.4924  | 10.67247 | 0.000324       | 2.99612       |
| Within                     | 144.4754  | 12        | 12.03961  |          |                |               |
| Total                      | 2645.218  | 23        |           |          |                |               |

**Table S15.** TWO WAY ANOVA analysis for 48h treatment: type of extract vs cell type at 50  $\mu$ M concentration. Sample: (samples 1-4); columns: cell type (HeLa, MCF-7, MRC-5)

| ANOVA                      |           |           |           |          |                |               |
|----------------------------|-----------|-----------|-----------|----------|----------------|---------------|
| <i>Source of Variation</i> | <i>SS</i> | <i>df</i> | <i>MS</i> | <i>F</i> | <i>P-value</i> | <i>F crit</i> |
| Sample                     | 1176.766  | 3         | 392.2554  | 57.78582 | 2.1E-07        | 3.490295      |
| Columns                    | 1848.866  | 2         | 924.433   | 136.1845 | 5.65E-09       | 3.885294      |
| Interaction                | 601.5772  | 6         | 100.2629  | 14.77041 | 6.49E-05       | 2.99612       |
| Within                     | 81.4571   | 12        | 6.788091  |          |                |               |
| Total                      | 3708.667  | 23        |           |          |                |               |

**Table S16.** TWO WAY ANOVA analysis for 48h treatment: type of extract vs cell type at 75  $\mu$ M concentration. Sample: (samples 1-4); columns: cell type (HeLa, MCF-7, MRC-5)

| ANOVA                      |           |           |           |          |                |               |
|----------------------------|-----------|-----------|-----------|----------|----------------|---------------|
| <i>Source of Variation</i> | <i>SS</i> | <i>df</i> | <i>MS</i> | <i>F</i> | <i>P-value</i> | <i>F crit</i> |
| Sample                     | 2076.138  | 3         | 692.0459  | 70.95135 | 6.62E-08       | 3.490295      |
| Columns                    | 1071.586  | 2         | 535.793   | 54.93167 | 9.12E-07       | 3.885294      |
| Interaction                | 767.5299  | 6         | 127.9217  | 13.11505 | 0.000118       | 2.99612       |
| Within                     | 117.0457  | 12        | 9.753808  |          |                |               |
| Total                      | 4032.299  | 23        |           |          |                |               |

**Table S17.** TWO WAY ANOVA analysis for 48h treatment: type of extract vs cell type at 100  $\mu$ M concentration. Sample: (samples 1-4); columns: cell type (HeLa, MCF-7, MRC-5)

| ANOVA                      |           |           |           |          |                |               |
|----------------------------|-----------|-----------|-----------|----------|----------------|---------------|
| <i>Source of Variation</i> | <i>SS</i> | <i>df</i> | <i>MS</i> | <i>F</i> | <i>P-value</i> | <i>F crit</i> |
| Sample                     | 2754.973  | 3         | 918.3243  | 535.103  | 4.88E-13       | 3.490295      |
| Columns                    | 1581.67   | 2         | 790.8349  | 460.8156 | 4.51E-12       | 3.885294      |
| Interaction                | 941.3597  | 6         | 156.8933  | 91.42094 | 2.6E-09        | 2.99612       |
| Within                     | 20.59396  | 12        | 1.716164  |          |                |               |
| Total                      | 5298.597  | 23        |           |          |                |               |

**Table S18.** TWO WAY ANOVA analysis for 48h treatment: type of extract vs cell type at 125  $\mu$ M concentration. Sample: (samples 1-4); columns: cell type (HeLa, MCF-7, MRC-5)

| ANOVA                      |           |           |           |          |                |               |
|----------------------------|-----------|-----------|-----------|----------|----------------|---------------|
| <i>Source of Variation</i> | <i>SS</i> | <i>df</i> | <i>MS</i> | <i>F</i> | <i>P-value</i> | <i>F crit</i> |
| Sample                     | 3014.384  | 3         | 1004.795  | 261.0037 | 3.45E-11       | 3.490295      |
| Columns                    | 2235.901  | 2         | 1117.95   | 290.3968 | 6.88E-11       | 3.885294      |
| Interaction                | 1514.546  | 6         | 252.4243  | 65.56928 | 1.79E-08       | 2.99612       |
| Within                     | 46.19681  | 12        | 3.849734  |          |                |               |
| Total                      | 6811.028  | 23        |           |          |                |               |
